# Supplementary material for: Anchoring on Historical Round Number Reference Points: Evidence from Durable Goods Resale Prices
Source: Atypon-hosted journal article supplement (doi:10.1287/orsc.2022.1632), 2022-10-22
Supplement: orsc.2022.1632.sm1.pdf [file orsc.2022.1632.sm1.pdf]

## APPENDIX

### Appendix 1: Experimental Pretest

The design of the pretest was similar to the design of Study 2 but included only three previous sale price conditions: far-above the round-number reference point, just above it, and just below it. We provided 300 participants recruited from Amazon's Mturk.com website with a host of information and pictures about seven properties to make participants' experiences comparable to what home buyers see when viewing properties on real estate websites. For each house, participants viewed one of three versions of the previous sale price: a price above the reference point (e.g., \$261,000), a price just below the reference point (e.g., \$259,000), or a price significantly below the reference point (e.g., \$257,000). The hypothesis test for this design is that the difference in estimated price between the just-above and just-below conditions would be much larger than the difference between the just-below and far-below conditions.

Table A7 shows correlations, Table A8 shows the mean estimated listing price by condition by house, and Table A9 shows the results of the mixed-model analyses. When we used standardized values of the housing estimate as the dependent variable, we found that the average difference ( $M = \$6,258$ ,  $SD = \$3,025$ ) in estimated list prices between the just-above and just-below conditions was much larger than the average difference ( $M = -\$332$ ,  $SD = \$3,065$ ) between the just-below and far-below conditions ( $X^2 = 2.03$ ,  $p=0.154$ ,  $d = 2.16$ ). While the estimated discontinuity is large, the variance is also large. The pretest revealed a need for significantly more power in order to detect discontinuities. We therefore pre-registered a new study using a much larger sample and added the control variable of participants' home zip codes.

**Figure A1: Study 1 Identification Test—Home Sq. Footage Similar Around \$10,000 Discontinuities**

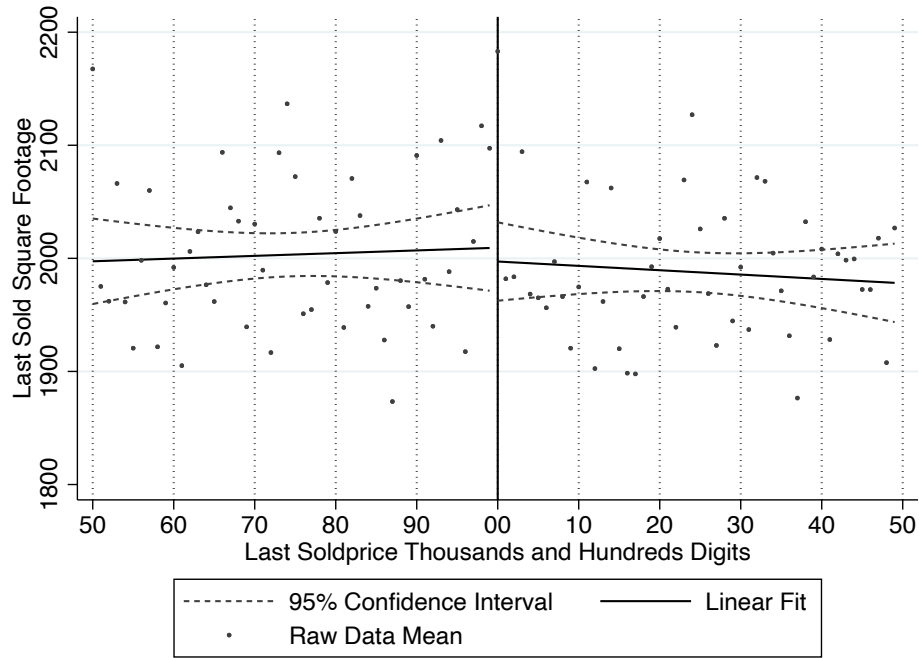

Note: This figure presents raw data for home square footage for all previous sales bucketed by the thousands and hundreds digits in that sales final sales prices. “00” refers to \$10,000. It shows homes are similar in total square footage around the \$10,000 price thresholds.

**Figure A2: Study 1 Identification Test—Percentage of Seller Concessions Provided Around \$10,000 Discontinuities are Similar**

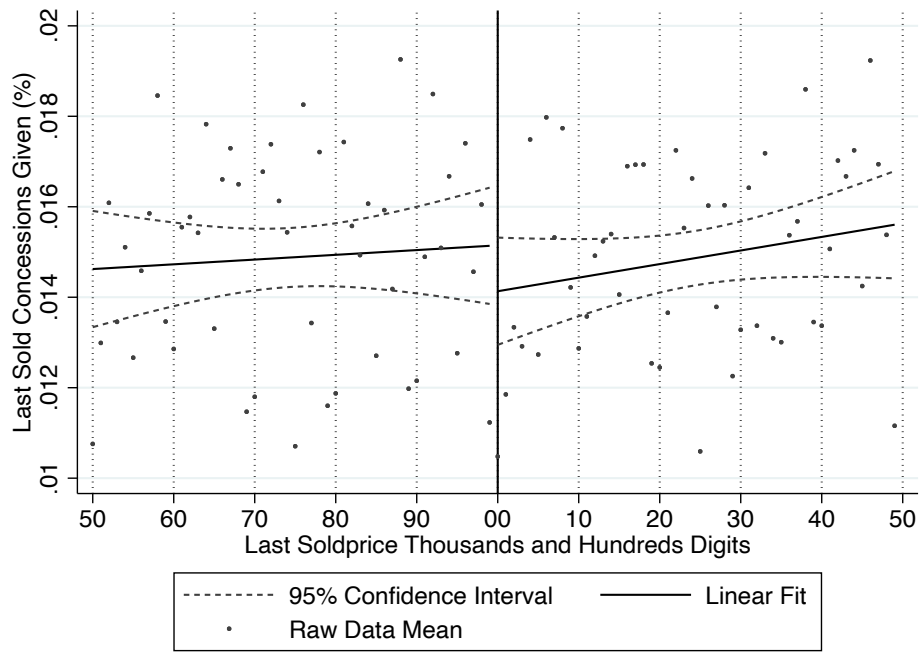

Note: This figure presents raw data for seller concessions given, calculated as a percentage of the home sales price, bucketed by the thousands and hundreds digits in that sales final sales prices. “00” refers to \$10,000. A higher percentage of seller concessions reduces the net price for buyers. This figure suggests similar seller concessions for houses above and below the threshold.

**Figure A3: Study 1 Discontinuity Placebo Tests**

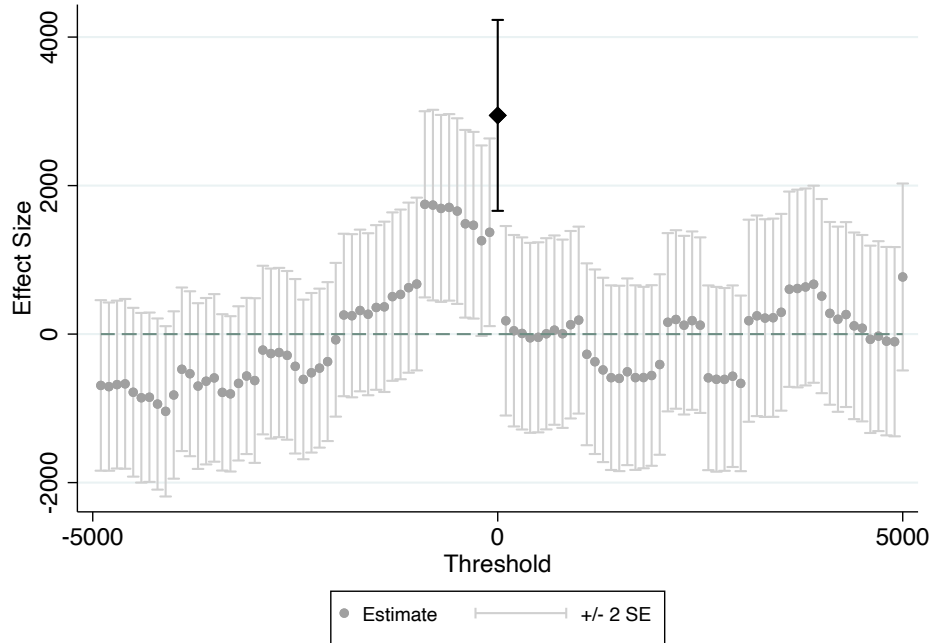

Note: This figure presents the average estimated sales price discontinuities for our fully controlled model with 100 placebo simulations. For each simulation we assigned the discontinuity to a \$100 interval within \$5,000 above and below the true \$10,000 round number discontinuity. The results suggest that our main results using the \$10,000 round number discontinuities is not driven by a spurious correlation in the data or our model.

**Figure A4: Study 1 Robustness to Sample Cutoff Points**

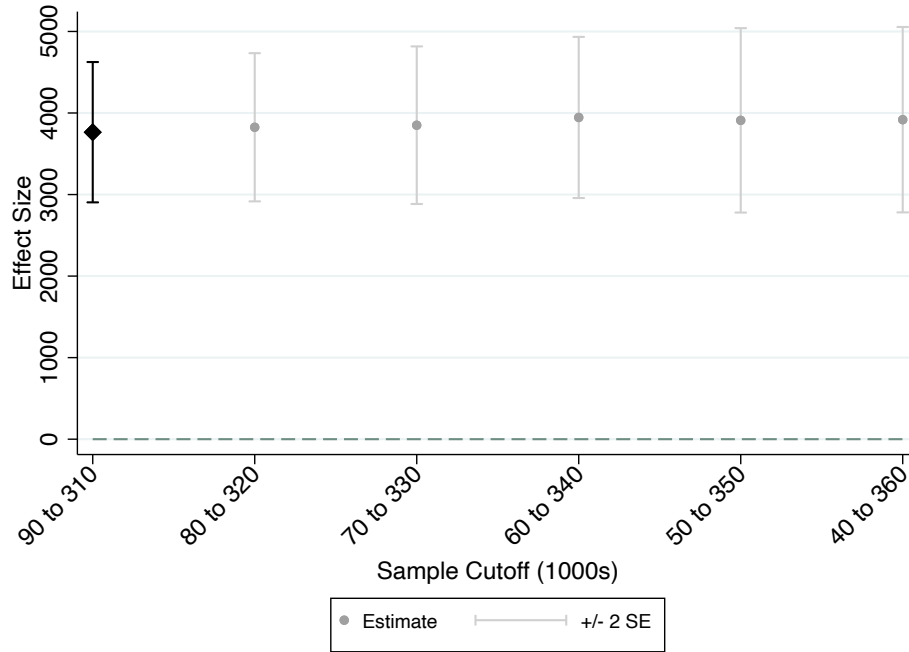

Note: This table presents the average estimated sales price discontinuity for the fully controlled model with variations in the sample cutoff at both the bottom and top ends of the distribution. The main models presented in the paper use a sample cutoff of \$90,000-\$310,000 (bolded estimate shown as the diamond on the far left of the figure). This table presents robustness of our main model estimates to a maximum sample cutoff of \$360,000 on the top end, with the bottom end of the distribution extended to \$40,000.

Figure A5: Study 4 Binned Scatter Plot of Car Price by \$10K and \$5K Thresholds

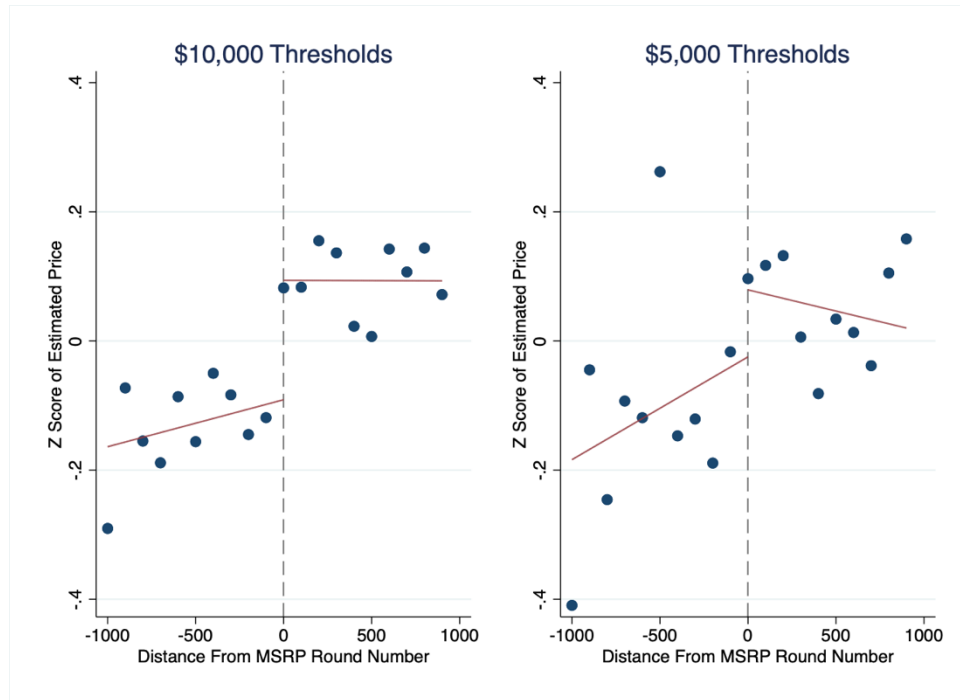

Note: This figure presents a raw data binned scatter plot using all vehicle estimates from the car pricing experiment. The panel on the left shows the discontinuity for the five vehicles whose MSRP spanned a \$10K price threshold. The panel on the right shows the discontinuity for the two vehicles whose MSRP spanned a \$5K price threshold. Solid lines represent linear fits above or below the round number price threshold.

**Table A1: Study1 Balance T-Tests for Each \$10,000 Round Number Threshold**

**Previous Sales Price +/- 500 from \$100,000 Threshold**

| <u>Variable</u>     | <u>N</u>     |              | <u>Mean</u>  |              | <u>Diff.</u> | <u>Std. Dev.</u> |          | <u>P-Value</u> |
|---------------------|--------------|--------------|--------------|--------------|--------------|------------------|----------|----------------|
|                     | <u>Below</u> | <u>Above</u> | <u>Below</u> | <u>Above</u> |              | <u>Diff.</u>     |          |                |
| Square Feet         | 337          | 519          | 1416.602     | 1452.921     | -36.31863    | 29.66191         | .2211315 |                |
| Acreage             | 337          | 520          | .1317211     | .1376154     | -.0058943    | .0072711         | .4177903 |                |
| # Bedrooms          | 337          | 520          | 2.928783     | 2.996154     | -.0673705    | .0633792         | .2880938 |                |
| # Bathrooms         | 337          | 520          | 1.543027     | 1.567308     | -.024281     | .0413735         | .5574443 |                |
| % Finished Basement | 337          | 520          | 27.37389     | 29.61538     | -2.241497    | 2.743824         | .4141991 |                |
| Year Built          | 338          | 520          | 1961.207     | 1961.531     | -.3236686    | 1.922089         | .866313  |                |

**Previous Sales Price +/- 500 from \$110,000 Threshold**

| <u>Variable</u>     | <u>N</u>     |              | <u>Mean</u>  |              | <u>Diff.</u> | <u>Std. Dev.</u> |          | <u>P-Value</u> |
|---------------------|--------------|--------------|--------------|--------------|--------------|------------------|----------|----------------|
|                     | <u>Below</u> | <u>Above</u> | <u>Below</u> | <u>Above</u> |              | <u>Diff.</u>     |          |                |
| Square Feet         | 374          | 683          | 1477.449     | 1565.378     | -87.92855    | 27.49113         | .0014229 |                |
| Acreage             | 374          | 683          | .1409893     | .1419327     | -.0009433    | .0074846         | .8997257 |                |
| # Bedrooms          | 374          | 683          | 3.026738     | 3.122987     | -.0962489    | .0575152         | .0945348 |                |
| # Bathrooms         | 374          | 683          | 1.671123     | 1.698389     | -.0272665    | .0392318         | .487203  |                |
| % Finished Basement | 374          | 683          | 31.57487     | 36.79649     | -5.22162     | 2.643491         | .0484973 |                |
| Year Built          | 374          | 683          | 1968.086     | 1964.772     | 3.313966     | 1.704262         | .0520987 |                |

**Previous Sales Price +/- 500 from \$120,000 Threshold**

| <u>Variable</u>     | <u>N</u>     |              | <u>Mean</u>  |              | <u>Diff.</u> | <u>Std. Dev.</u> |          | <u>P-Value</u> |
|---------------------|--------------|--------------|--------------|--------------|--------------|------------------|----------|----------------|
|                     | <u>Below</u> | <u>Above</u> | <u>Below</u> | <u>Above</u> |              | <u>Diff.</u>     |          |                |
| Square Feet         | 537          | 665          | 1630.108     | 1717.517     | -87.40929    | 25.68914         | .0006895 |                |
| Acreage             | 537          | 665          | .1524767     | .1550226     | -.0025458    | .0057997         | .6607678 |                |
| # Bedrooms          | 537          | 665          | 3.180633     | 3.374436     | -.1938029    | .0537829         | .0003269 |                |
| # Bathrooms         | 537          | 665          | 1.780261     | 1.864662     | -.0844009    | .0372202         | .0235302 |                |
| % Finished Basement | 537          | 665          | 40.81192     | 42.33534     | -1.52342     | 2.492751         | .5412226 |                |
| Year Built          | 538          | 665          | 1968.697     | 1968.713     | -.0157559    | 1.467697         | .9914365 |                |

**Previous Sales Price +/- 500 from \$130,000 Threshold**

| <u>Variable</u>     | <u>N</u>     |              | <u>Mean</u>  |              | <u>Diff.</u> | <u>Std. Dev.</u> |          | <u>P-Value</u> |
|---------------------|--------------|--------------|--------------|--------------|--------------|------------------|----------|----------------|
|                     | <u>Below</u> | <u>Above</u> | <u>Below</u> | <u>Above</u> |              | <u>Diff.</u>     |          |                |
| Square Feet         | 597          | 780          | 1713.626     | 1745.512     | -31.88507    | 23.58949         | .176705  |                |
| Acreage             | 597          | 780          | .158526      | .1620897     | -.0035638    | .0048048         | .4583869 |                |
| # Bedrooms          | 597          | 780          | 3.301508     | 3.357692     | -.0561848    | .0477216         | .239262  |                |
| # Bathrooms         | 597          | 780          | 1.859296     | 1.901282     | -.0419856    | .0343166         | .2213598 |                |
| % Finished Basement | 597          | 780          | 46.66332     | 44.81154     | 1.851778     | 2.369578         | .4346547 |                |
| Year Built          | 598          | 781          | 1972.05      | 1969.498     | 2.552088     | 1.397968         | .0681317 |                |

**Previous Sales Price +/- 500 from \$140,000 Threshold**

| <b>Variable</b>     | <b><u>N</u></b><br><b><u>Below</u></b> | <b><u>N</u></b><br><b><u>Above</u></b> | <b><u>Mean</u></b><br><b><u>Below</u></b> | <b><u>Mean</u></b><br><b><u>Above</u></b> | <b><u>Diff.</u></b> | <b><u>Std. Dev.</u></b><br><b><u>Diff.</u></b> | <b><u>P-Value</u></b> |
|---------------------|----------------------------------------|----------------------------------------|-------------------------------------------|-------------------------------------------|---------------------|------------------------------------------------|-----------------------|
| Square Feet         | 537                                    | 765                                    | 1838.741                                  | 1877.336                                  | -38.59479           | 26.97271                                       | .1527041              |
| Acreage             | 537                                    | 766                                    | .1634078                                  | .1967363                                  | -.0333285           | .0181767                                       | .0669448              |
| # Bedrooms          | 536                                    | 766                                    | 3.43097                                   | 3.460836                                  | -.0298654           | .0506039                                       | .5551735              |
| # Bathrooms         | 537                                    | 766                                    | 2.046555                                  | 2.010444                                  | .0361111            | .0375711                                       | .33666                |
| % Finished Basement | 537                                    | 766                                    | 49.00186                                  | 49.58616                                  | -.5842997           | 2.456397                                       | .8120205              |
| Year Built          | 539                                    | 766                                    | 1975.382                                  | 1972.304                                  | 3.078012            | 1.349745                                       | .0227425              |

**Previous Sales Price +/- 500 from \$150,000 Threshold**

| <b>Variable</b>     | <b><u>N</u></b><br><b><u>Below</u></b> | <b><u>N</u></b><br><b><u>Above</u></b> | <b><u>Mean</u></b><br><b><u>Below</u></b> | <b><u>Mean</u></b><br><b><u>Above</u></b> | <b><u>Diff.</u></b> | <b><u>Std. Dev.</u></b><br><b><u>Diff.</u></b> | <b><u>P-Value</u></b> |
|---------------------|----------------------------------------|----------------------------------------|-------------------------------------------|-------------------------------------------|---------------------|------------------------------------------------|-----------------------|
| Square Feet         | 555                                    | 764                                    | 1928.953                                  | 2016.463                                  | -87.5102            | 27.84909                                       | .0017136              |
| Acreage             | 556                                    | 764                                    | .1661331                                  | .177055                                   | -.0109219           | .0050887                                       | .0320296              |
| # Bedrooms          | 556                                    | 761                                    | 3.48741                                   | 3.646518                                  | -.1591077           | .0499204                                       | .0014703              |
| # Bathrooms         | 556                                    | 764                                    | 2.133094                                  | 2.217277                                  | -.084184            | .0378017                                       | .0261164              |
| % Finished Basement | 556                                    | 764                                    | 47.32374                                  | 53.62173                                  | -6.297987           | 2.456176                                       | .0104531              |
| Year Built          | 556                                    | 764                                    | 1976.038                                  | 1974.692                                  | 1.345361            | 1.347396                                       | .3182252              |

**Previous Sales Price +/- 500 from \$160,000 Threshold**

| <b>Variable</b>     | <b><u>N</u></b><br><b><u>Below</u></b> | <b><u>N</u></b><br><b><u>Above</u></b> | <b><u>Mean</u></b><br><b><u>Below</u></b> | <b><u>Mean</u></b><br><b><u>Above</u></b> | <b><u>Diff.</u></b> | <b><u>Std. Dev.</u></b><br><b><u>Diff.</u></b> | <b><u>P-Value</u></b> |
|---------------------|----------------------------------------|----------------------------------------|-------------------------------------------|-------------------------------------------|---------------------|------------------------------------------------|-----------------------|
| Square Feet         | 468                                    | 705                                    | 2071.429                                  | 2017.555                                  | 53.87488            | 30.36568                                       | .0762894              |
| Acreage             | 468                                    | 705                                    | .1790812                                  | .201305                                   | -.0222238           | .0332751                                       | .5043417              |
| # Bedrooms          | 468                                    | 705                                    | 3.666667                                  | 3.558865                                  | .1078014            | .059032                                        | .0680819              |
| # Bathrooms         | 468                                    | 705                                    | 2.320513                                  | 2.190071                                  | .1304419            | .0414701                                       | .0017001              |
| % Finished Basement | 468                                    | 705                                    | 56.67521                                  | 50.60993                                  | 6.065285            | 2.595542                                       | .019617               |
| Year Built          | 468                                    | 705                                    | 1975.325                                  | 1974.577                                  | .7474814            | 1.539964                                       | .6274913              |

**Previous Sales Price +/- 500 from \$170,000 Threshold**

| <b>Variable</b>     | <b><u>N</u></b><br><b><u>Below</u></b> | <b><u>N</u></b><br><b><u>Above</u></b> | <b><u>Mean</u></b><br><b><u>Below</u></b> | <b><u>Mean</u></b><br><b><u>Above</u></b> | <b><u>Diff.</u></b> | <b><u>Std. Dev.</u></b><br><b><u>Diff.</u></b> | <b><u>P-Value</u></b> |
|---------------------|----------------------------------------|----------------------------------------|-------------------------------------------|-------------------------------------------|---------------------|------------------------------------------------|-----------------------|
| Square Feet         | 461                                    | 622                                    | 2138.523                                  | 2128.111                                  | 10.41184            | 34.73618                                       | .7644327              |
| Acreage             | 461                                    | 622                                    | .1768764                                  | .1858039                                  | -.0089275           | .0067545                                       | .1865455              |
| # Bedrooms          | 461                                    | 622                                    | 3.574837                                  | 3.596463                                  | -.0216257           | .0594741                                       | .716216               |
| # Bathrooms         | 461                                    | 622                                    | 2.314534                                  | 2.278135                                  | .0363986            | .0485372                                       | .4534712              |
| % Finished Basement | 461                                    | 622                                    | 46.20174                                  | 50.7926                                   | -4.590869           | 2.685647                                       | .0876622              |
| Year Built          | 461                                    | 622                                    | 1980.098                                  | 1973.683                                  | 6.414334            | 1.602822                                       | .0000671              |

**Previous Sales Price +/- 500 from \$180,000 Threshold**

| <u>Variable</u>     | <u>N</u><br><u>Below</u> | <u>N</u><br><u>Above</u> | <u>Mean</u><br><u>Below</u> | <u>Mean</u><br><u>Above</u> | <u>Diff.</u> | <u>Std. Dev.</u><br><u>Diff.</u> | <u>P-Value</u> |
|---------------------|--------------------------|--------------------------|-----------------------------|-----------------------------|--------------|----------------------------------|----------------|
| Square Feet         | 341                      | 516                      | 2213.66                     | 2267.684                    | -54.02428    | 41.54018                         | .1937696       |
| Acreage             | 341                      | 516                      | .198563                     | .2116473                    | -.0130842    | .0140609                         | .352354        |
| # Bedrooms          | 341                      | 516                      | 3.624633                    | 3.70155                     | -.076917     | .0679275                         | .2578094       |
| # Bathrooms         | 341                      | 516                      | 2.404692                    | 2.352713                    | .0519789     | .0500624                         | .2994317       |
| % Finished Basement | 341                      | 516                      | 52.19648                    | 55.26744                    | -3.070961    | 3.067341                         | .317023        |
| Year Built          | 341                      | 516                      | 1975.833                    | 1973.634                    | 2.199124     | 1.875145                         | .2412126       |

**Previous Sales Price +/- 500 from \$190,000 Threshold**

| <u>Variable</u>     | <u>N</u><br><u>Below</u> | <u>N</u><br><u>Above</u> | <u>Mean</u><br><u>Below</u> | <u>Mean</u><br><u>Above</u> | <u>Diff.</u> | <u>Std. Dev.</u><br><u>Diff.</u> | <u>P-Value</u> |
|---------------------|--------------------------|--------------------------|-----------------------------|-----------------------------|--------------|----------------------------------|----------------|
| Square Feet         | 299                      | 477                      | 2362.201                    | 2291.208                    | 70.99312     | 47.32126                         | .1339608       |
| Acreage             | 299                      | 477                      | .1992308                    | .2131027                    | -.013872     | .0212859                         | .5147898       |
| # Bedrooms          | 299                      | 477                      | 3.732441                    | 3.737945                    | -.005504     | .0717744                         | .938894        |
| # Bathrooms         | 299                      | 477                      | 2.545151                    | 2.471698                    | .0734524     | .0549159                         | .1814387       |
| % Finished Basement | 299                      | 477                      | 50.71906                    | 55.75262                    | -5.033557    | 3.277737                         | .1250254       |
| Year Built          | 299                      | 477                      | 1983.09                     | 1975.138                    | 7.951936     | 1.91876                          | .0000378       |

**Previous Sales Price +/- 500 from \$200,000 Threshold**

| <u>Variable</u>     | <u>N</u><br><u>Below</u> | <u>N</u><br><u>Above</u> | <u>Mean</u><br><u>Below</u> | <u>Mean</u><br><u>Above</u> | <u>Diff.</u> | <u>Std. Dev.</u><br><u>Diff.</u> | <u>P-Value</u> |
|---------------------|--------------------------|--------------------------|-----------------------------|-----------------------------|--------------|----------------------------------|----------------|
| Square Feet         | 283                      | 395                      | 2340.668                    | 2390.073                    | -49.40557    | 52.45333                         | .3465824       |
| Acreage             | 283                      | 395                      | .2005654                    | .2031646                    | -.0025992    | .0121663                         | .8308935       |
| # Bedrooms          | 283                      | 395                      | 3.759717                    | 3.832911                    | -.0731941    | .0819566                         | .3721306       |
| # Bathrooms         | 283                      | 395                      | 2.572438                    | 2.518987                    | .0534508     | .0616691                         | .3863941       |
| % Finished Basement | 283                      | 395                      | 54.30742                    | 57.4481                     | -3.140681    | 3.455174                         | .3636851       |
| Year Built          | 283                      | 395                      | 1981.813                    | 1975.711                    | 6.101328     | 2.064652                         | .003234        |

**Previous Sales Price +/- 500 from \$210,000 Threshold**

| <u>Variable</u>     | <u>N</u><br><u>Below</u> | <u>N</u><br><u>Above</u> | <u>Mean</u><br><u>Below</u> | <u>Mean</u><br><u>Above</u> | <u>Diff.</u> | <u>Std. Dev.</u><br><u>Diff.</u> | <u>P-Value</u> |
|---------------------|--------------------------|--------------------------|-----------------------------|-----------------------------|--------------|----------------------------------|----------------|
| Square Feet         | 176                      | 414                      | 2474.682                    | 2407.37                     | 67.31225     | 60.08651                         | .2630622       |
| Acreage             | 176                      | 414                      | .2373295                    | .2174879                    | .0198416     | .0348102                         | .5688987       |
| # Bedrooms          | 176                      | 414                      | 3.721591                    | 3.785024                    | -.0634332    | .0915946                         | .4888693       |
| # Bathrooms         | 176                      | 414                      | 2.5                         | 2.521739                    | -.0217391    | .0697518                         | .7554063       |
| % Finished Basement | 176                      | 414                      | 48.8125                     | 54.14976                    | -5.337258    | 4.077032                         | .1910105       |
| Year Built          | 176                      | 414                      | 1980.273                    | 1973.529                    | 6.743742     | 2.52227                          | .0077109       |

**Previous Sales Price +/- 500 from \$220,000 Threshold**

| <b>Variable</b>     | <b><u>N</u></b><br><b><u>Below</u></b> | <b><u>N</u></b><br><b><u>Above</u></b> | <b><u>Mean</u></b><br><b><u>Below</u></b> | <b><u>Mean</u></b><br><b><u>Above</u></b> | <b><u>Diff.</u></b> | <b><u>Std. Dev.</u></b><br><b><u>Diff.</u></b> | <b><u>P-Value</u></b> |
|---------------------|----------------------------------------|----------------------------------------|-------------------------------------------|-------------------------------------------|---------------------|------------------------------------------------|-----------------------|
| Square Feet         | 165                                    | 397                                    | 2488.6                                    | 2544.139                                  | -55.53854           | 68.74514                                       | .4194967              |
| Acreage             | 165                                    | 398                                    | .2455152                                  | .2346985                                  | .0108167            | .0322203                                       | .7372152              |
| # Bedrooms          | 165                                    | 398                                    | 4.036364                                  | 3.801508                                  | .2348561            | .0983616                                       | .0172851              |
| # Bathrooms         | 165                                    | 398                                    | 2.672727                                  | 2.610553                                  | .0621745            | .0678181                                       | .3596503              |
| % Finished Basement | 165                                    | 398                                    | 59.80606                                  | 53.13317                                  | 6.672895            | 4.148751                                       | .1083079              |
| Year Built          | 165                                    | 398                                    | 1979.436                                  | 1977.49                                   | 1.946414            | 2.458631                                       | .4288901              |

**Previous Sales Price +/- 500 from \$230,000 Threshold**

| <b>Variable</b>     | <b><u>N</u></b><br><b><u>Below</u></b> | <b><u>N</u></b><br><b><u>Above</u></b> | <b><u>Mean</u></b><br><b><u>Below</u></b> | <b><u>Mean</u></b><br><b><u>Above</u></b> | <b><u>Diff.</u></b> | <b><u>Std. Dev.</u></b><br><b><u>Diff.</u></b> | <b><u>P-Value</u></b> |
|---------------------|----------------------------------------|----------------------------------------|-------------------------------------------|-------------------------------------------|---------------------|------------------------------------------------|-----------------------|
| Square Feet         | 184                                    | 339                                    | 2541.31                                   | 2646.198                                  | -104.8879           | 66.46036                                       | .1151262              |
| Acreage             | 184                                    | 339                                    | .2010326                                  | .2175811                                  | -.0165485           | .013994                                        | .2375298              |
| # Bedrooms          | 184                                    | 338                                    | 3.896739                                  | 3.828402                                  | .0683368            | .0937991                                       | .4666086              |
| # Bathrooms         | 184                                    | 339                                    | 2.673913                                  | 2.666667                                  | .0072464            | .074596                                        | .9226513              |
| % Finished Basement | 184                                    | 339                                    | 54.14674                                  | 55.9351                                   | -1.788364           | 4.059224                                       | .6597085              |
| Year Built          | 184                                    | 339                                    | 1979.554                                  | 1976.681                                  | 2.872932            | 2.691244                                       | .2862357              |

**Previous Sales Price +/- 500 from \$240,000 Threshold**

| <b>Variable</b>     | <b><u>N</u></b><br><b><u>Below</u></b> | <b><u>N</u></b><br><b><u>Above</u></b> | <b><u>Mean</u></b><br><b><u>Below</u></b> | <b><u>Mean</u></b><br><b><u>Above</u></b> | <b><u>Diff.</u></b> | <b><u>Std. Dev.</u></b><br><b><u>Diff.</u></b> | <b><u>P-Value</u></b> |
|---------------------|----------------------------------------|----------------------------------------|-------------------------------------------|-------------------------------------------|---------------------|------------------------------------------------|-----------------------|
| Square Feet         | 181                                    | 309                                    | 2684.066                                  | 2836.725                                  | -152.6586           | 69.23359                                       | .0279213              |
| Acreage             | 181                                    | 309                                    | .2028177                                  | .2331392                                  | -.0303215           | .0178068                                       | .0892418              |
| # Bedrooms          | 181                                    | 308                                    | 3.966851                                  | 3.996753                                  | -.0299024           | .0975933                                       | .7594325              |
| # Bathrooms         | 181                                    | 309                                    | 2.674033                                  | 2.834951                                  | -.1609183           | .067575                                        | .0176328              |
| % Finished Basement | 181                                    | 309                                    | 56.97238                                  | 54.6343                                   | 2.338071            | 4.190598                                       | .5771462              |
| Year Built          | 181                                    | 309                                    | 1978.343                                  | 1979.961                                  | -1.618624           | 2.635803                                       | .5394411              |

**Previous Sales Price +/- 500 from \$250,000 Threshold**

| <b>Variable</b>     | <b><u>N</u></b><br><b><u>Below</u></b> | <b><u>N</u></b><br><b><u>Above</u></b> | <b><u>Mean</u></b><br><b><u>Below</u></b> | <b><u>Mean</u></b><br><b><u>Above</u></b> | <b><u>Diff.</u></b> | <b><u>Std. Dev.</u></b><br><b><u>Diff.</u></b> | <b><u>P-Value</u></b> |
|---------------------|----------------------------------------|----------------------------------------|-------------------------------------------|-------------------------------------------|---------------------|------------------------------------------------|-----------------------|
| Square Feet         | 166                                    | 378                                    | 2779.669                                  | 2812.926                                  | -33.25725           | 71.83693                                       | .6435826              |
| Acreage             | 166                                    | 378                                    | .235241                                   | .2538624                                  | -.0186215           | .0323311                                       | .5648807              |
| # Bedrooms          | 166                                    | 378                                    | 3.993976                                  | 3.957672                                  | .0363039            | .1015195                                       | .7207777              |
| # Bathrooms         | 166                                    | 378                                    | 2.837349                                  | 2.820106                                  | .0172436            | .0704602                                       | .8067597              |
| % Finished Basement | 166                                    | 378                                    | 52.13855                                  | 56.00265                                  | -3.864091           | 4.167002                                       | .3541798              |
| Year Built          | 167                                    | 378                                    | 1981.443                                  | 1978.034                                  | 3.408722            | 2.584999                                       | .1878403              |

**Previous Sales Price +/- 500 from \$260,000 Threshold**

| <b>Variable</b>     | <b><u>N</u></b><br><b><u>Below</u></b> | <b><u>N</u></b><br><b><u>Above</u></b> | <b><u>Mean</u></b><br><b><u>Below</u></b> | <b><u>Mean</u></b><br><b><u>Above</u></b> | <b><u>Diff.</u></b> | <b><u>Std. Dev.</u></b><br><b><u>Diff.</u></b> | <b><u>P-Value</u></b> |
|---------------------|----------------------------------------|----------------------------------------|-------------------------------------------|-------------------------------------------|---------------------|------------------------------------------------|-----------------------|
| Square Feet         | 116                                    | 237                                    | 2853.19                                   | 2886.211                                  | -33.02132           | 97.38227                                       | .734745               |
| Acreage             | 116                                    | 237                                    | .2456897                                  | .2525738                                  | -.0068842           | .0221992                                       | .7566613              |
| # Bedrooms          | 116                                    | 237                                    | 4.017241                                  | 3.953586                                  | .0636549            | .1188995                                       | .5927351              |
| # Bathrooms         | 116                                    | 237                                    | 2.758621                                  | 2.746835                                  | .0117852            | .0884891                                       | .894125               |
| % Finished Basement | 116                                    | 237                                    | 56.08621                                  | 55.4346                                   | .6516077            | 4.958629                                       | .8955272              |
| Year Built          | 116                                    | 237                                    | 1982.233                                  | 1975.321                                  | 6.912084            | 3.113007                                       | .0270305              |

**Previous Sales Price +/- 500 from \$270,000 Threshold**

| <b>Variable</b>     | <b><u>N</u></b><br><b><u>Below</u></b> | <b><u>N</u></b><br><b><u>Above</u></b> | <b><u>Mean</u></b><br><b><u>Below</u></b> | <b><u>Mean</u></b><br><b><u>Above</u></b> | <b><u>Diff.</u></b> | <b><u>Std. Dev.</u></b><br><b><u>Diff.</u></b> | <b><u>P-Value</u></b> |
|---------------------|----------------------------------------|----------------------------------------|-------------------------------------------|-------------------------------------------|---------------------|------------------------------------------------|-----------------------|
| Square Feet         | 89                                     | 215                                    | 2977.202                                  | 3056.056                                  | -78.85357           | 109.4157                                       | .4716645              |
| Acreage             | 89                                     | 215                                    | .3230337                                  | .2884651                                  | .0345686            | .0693026                                       | .6182787              |
| # Bedrooms          | 89                                     | 215                                    | 3.921348                                  | 4.204651                                  | -.2833028           | .1263453                                       | .0256681              |
| # Bathrooms         | 89                                     | 215                                    | 2.707865                                  | 2.865116                                  | -.1572511           | .0966295                                       | .1047031              |
| % Finished Basement | 89                                     | 215                                    | 53.83146                                  | 63.51163                                  | -9.680167           | 5.374095                                       | .0726586              |
| Year Built          | 89                                     | 215                                    | 1980.36                                   | 1977.135                                  | 3.224667            | 3.179387                                       | .3112792              |

**Previous Sales Price +/- 500 from \$280,000 Threshold**

| <b>Variable</b>     | <b><u>N</u></b><br><b><u>Below</u></b> | <b><u>N</u></b><br><b><u>Above</u></b> | <b><u>Mean</u></b><br><b><u>Below</u></b> | <b><u>Mean</u></b><br><b><u>Above</u></b> | <b><u>Diff.</u></b> | <b><u>Std. Dev.</u></b><br><b><u>Diff.</u></b> | <b><u>P-Value</u></b> |
|---------------------|----------------------------------------|----------------------------------------|-------------------------------------------|-------------------------------------------|---------------------|------------------------------------------------|-----------------------|
| Square Feet         | 80                                     | 201                                    | 2864.863                                  | 3071.791                                  | -206.9285           | 115.0095                                       | .0730627              |
| Acreage             | 80                                     | 201                                    | .18475                                    | .2429851                                  | -.0582351           | .021229                                        | .0064787              |
| # Bedrooms          | 80                                     | 200                                    | 3.8375                                    | 4.275                                     | -.4375              | .1494395                                       | .0036984              |
| # Bathrooms         | 80                                     | 201                                    | 2.8                                       | 2.870647                                  | -.0706468           | .1042266                                       | .4984483              |
| % Finished Basement | 80                                     | 201                                    | 57.825                                    | 62.18905                                  | -4.364055           | 5.679655                                       | .4429195              |
| Year Built          | 80                                     | 201                                    | 1977.875                                  | 1975.597                                  | 2.277985            | 3.825435                                       | .5520027              |

**Previous Sales Price +/- 500 from \$290,000 Threshold**

| <b>Variable</b>     | <b><u>N</u></b><br><b><u>Below</u></b> | <b><u>N</u></b><br><b><u>Above</u></b> | <b><u>Mean</u></b><br><b><u>Below</u></b> | <b><u>Mean</u></b><br><b><u>Above</u></b> | <b><u>Diff.</u></b> | <b><u>Std. Dev.</u></b><br><b><u>Diff.</u></b> | <b><u>P-Value</u></b> |
|---------------------|----------------------------------------|----------------------------------------|-------------------------------------------|-------------------------------------------|---------------------|------------------------------------------------|-----------------------|
| Square Feet         | 93                                     | 197                                    | 3043.462                                  | 3183.102                                  | -139.6392           | 112.0905                                       | .2138606              |
| Acreage             | 93                                     | 197                                    | .2849462                                  | .2973604                                  | -.0124142           | .0542294                                       | .819094               |
| # Bedrooms          | 92                                     | 197                                    | 4.163043                                  | 4.116751                                  | .0462922            | .1376178                                       | .7368284              |
| # Bathrooms         | 93                                     | 197                                    | 2.935484                                  | 2.956853                                  | -.0213689           | .0982114                                       | .8279098              |
| % Finished Basement | 93                                     | 197                                    | 46.80645                                  | 58.16244                                  | -11.35598           | 5.755631                                       | .0494491              |
| Year Built          | 93                                     | 197                                    | 1988.538                                  | 1973.132                                  | 15.40565            | 3.58408                                        | .0000236              |

**Previous Sales Price +/- 500 from \$300,000 Threshold**

| <b><u>Variable</u></b> | <b><u>N</u></b><br><b><u>Below</u></b> | <b><u>N</u></b><br><b><u>Above</u></b> | <b><u>Mean</u></b><br><b><u>Below</u></b> | <b><u>Mean</u></b><br><b><u>Above</u></b> | <b><u>Diff.</u></b> | <b><u>Std. Dev.</u></b><br><b><u>Diff.</u></b> | <b><u>P-Value</u></b> |
|------------------------|----------------------------------------|----------------------------------------|-------------------------------------------|-------------------------------------------|---------------------|------------------------------------------------|-----------------------|
| Square Feet            | 92                                     | 155                                    | 3033.772                                  | 3141.329                                  | -107.5573           | 125.0384                                       | .390523               |
| Acreage                | 92                                     | 155                                    | .2502174                                  | .2450968                                  | .0051206            | .0278638                                       | .8543433              |
| # Bedrooms             | 92                                     | 155                                    | 4.097826                                  | 4.154839                                  | -.0570126           | .1486153                                       | .7015887              |
| # Bathrooms            | 92                                     | 155                                    | 2.793478                                  | 2.909677                                  | -.1161992           | .1121207                                       | .3010486              |
| % Finished Basement    | 92                                     | 155                                    | 59.86957                                  | 62.71613                                  | -2.846564           | 5.73275                                        | .619557               |
| Year Built             | 92                                     | 155                                    | 1982.739                                  | 1979.09                                   | 3.648808            | 3.582117                                       | .3093893              |

Note: Balance tests compare homes within \$500 (above and below) of a \$10,000 round number reference point threshold. Data are presented for variables cited in the literature as being key determinants of home value. P-values for Wald tests testing differences in variable means are presented in the final column.

**Table A2: Study 1 Control Variables**

| <b>Archival Data Variable</b>             | <b>N</b> | <b>Mean</b> | <b>Std Dev</b> | <b>Min</b> | <b>Max</b> |
|-------------------------------------------|----------|-------------|----------------|------------|------------|
| <i>House Controls</i>                     |          |             |                |            |            |
| Total # of bedrooms                       | 83164    | 3.70        | 1.06           | 1          | 15         |
| Total # of bathrooms                      | 83163    | 2.30        | 0.81           | 1          | 7          |
| Total # of kitchens                       | 83164    | 1.05        | 0.22           | 1          | 5          |
| Total # of fireplaces                     | 83164    | 0.62        | 0.70           | 0          | 11         |
| Total # of laundry rooms                  | 83160    | 0.98        | 0.28           | 0          | 3          |
| Total # of dining rooms                   | 83164    | 0.15        | 0.36           | 0          | 2          |
| Total # of family rooms                   | 83161    | 1.18        | 0.68           | 0          | 4          |
| % of basement finished                    | 83163    | 57.27       | 44.39          | 0          | 100        |
| Garage capacity                           | 83158    | 1.42        | 0.95           | 0          | 16         |
| Pool                                      | 83164    | 0.07        | 0.26           | 0          | 1          |
| log(square feet)                          | 83164    | 7.57        | 0.35           | 6.21       | 8.92       |
| log(acres)                                | 83164    | 0.16        | 0.10           | 0          | 2.94       |
| Year built                                | 83164    | 1974        | 26.23          | 1848       | 2013       |
| Property type                             | 83152    | 3.92        | 0.80           | 1          | 6          |
| Quality control dummies (*See list below) |          |             |                |            |            |
| <i>Transaction Controls</i>               |          |             |                |            |            |
| Immediate possession                      | 83164    | 0.27        | 0.44           | 0          | 1          |
| Dual agent                                | 83164    | 0.13        | 0.33           | 0          | 1          |
| Dual office                               | 83164    | 0.10        | 0.30           | 0          | 1          |
| <i>Time and Geographic Controls</i>       |          |             |                |            |            |
| Days since last sale                      | 83164    | 1514.16     | 1103.70        | 1          | 6530       |
| Year                                      | 83164    | 2007        | 3.70           | 1996       | 2014       |
| Month                                     | 83164    | 6.12        | 3.23           | 1          | 12         |
| Zip                                       | 83164    | 84142       | 162.14         | 84003      | 84664      |

**Quality control dummies:** TLC, needs updating, estate sale, foreclosure, handyman, as is, rehabber, bank owned, priced to sell, motivated, potential, close, exclamation, new, spacious, elegance, beautiful, remodeled, historic, maintained, wonderful, fantastic, charming, stunning, amazing, granite, immaculate, breathtaking, neighborhood, spectacular, landscaped, stained glass, built in, tasteful, must see, fabulous, leaded, delightful, move in, gourmet, Corian, custom, unique, maple, newer, hurry, pride, clean, quiet, dream, block, huge, deck, mint, hardwood, views, new roof, upgraded, vaulted, floor plan, award, hot tub, tile, cul-de-sac, jacuzzi, park, brick, value, windows, mother in law, stainless, theater, surround sound, pickiest, rare, starter, master, cute, warranty, temple, fenced

**Renovation controls:** Change in house, transaction, and quality controls between periods

**Table A3: Study 1 Discontinuity Results by Organizational Size**

| Dependent Variable:       | (1)<br>Large Firm<br>List Price | (2)<br>Small Firm<br>List Price | (3)<br>Large Firm<br>Sales Price | (4)<br>Small Firm<br>Sales Price | (5)<br>Large Firm<br>Net Price | (6)<br>Small Firm<br>Net Price |
|---------------------------|---------------------------------|---------------------------------|----------------------------------|----------------------------------|--------------------------------|--------------------------------|
| <b>Avg. Discontinuity</b> | <b>4127.44</b>                  | <b>2844.59</b>                  | <b>3063.72</b>                   | <b>2476.54</b>                   | <b>3103.69</b>                 | <b>2449.98</b>                 |
| <b>F-stat</b>             | <b>66.30</b>                    | <b>12.09</b>                    | <b>30.08</b>                     | <b>10.43</b>                     | <b>30.13</b>                   | <b>10.15</b>                   |
| <b>Prob &gt; F</b>        | <b>0.0000</b>                   | <b>0.0005</b>                   | <b>0.0000</b>                    | <b>0.0013</b>                    | <b>0.0000</b>                  | <b>0.0015</b>                  |
| \$100k                    | 2426.3**<br>(1154.6)            | -2771.7**<br>(1397.5)           | 1336.2<br>(1031.9)               | -1046.2<br>(1333.3)              | 1461.8<br>(1033.4)             | -989.6<br>(1340.4)             |
| \$110k                    | 451.2<br>(651.0)                | -1264.6<br>(883.9)              | 22.1<br>(605.7)                  | -1346.8<br>(843.3)               | -15.2<br>(604.3)               | -1307.1<br>(839.7)             |
| \$120k                    | 613.7<br>(490.5)                | 426.4<br>(791.4)                | 251.2<br>(533.4)                 | 882.6<br>(807.4)                 | 183.2<br>(532.0)               | 859.1<br>(800.1)               |
| \$130k                    | 870.3*<br>(446.8)               | 1385.0*<br>(726.6)              | 687.9<br>(468.3)                 | 2183.0***<br>(747.9)             | 668.1<br>(465.6)               | 2053.4***<br>(748.6)           |
| \$140k                    | 933.1**<br>(372.1)              | 899.3<br>(652.6)                | 914.7**<br>(462.6)               | 1569.2**<br>(681.8)              | 885.6*<br>(462.5)              | 1541.4**<br>(676.5)            |
| \$150k                    | 1713.3***<br>(415.2)            | 1432.5**<br>(691.2)             | 2018.6***<br>(463.1)             | 1700.0**<br>(751.5)              | 2059.7***<br>(453.9)           | 1770.5**<br>(757.3)            |
| \$160k                    | 1687.3***<br>(446.1)            | 1725.3**<br>(849.9)             | 1349.6***<br>(479.0)             | 2112.7**<br>(830.5)              | 1352.5***<br>(493.0)           | 2157.3***<br>(826.3)           |
| \$170k                    | 2001.1***<br>(583.5)            | -442.2<br>(906.0)               | 1465.5**<br>(586.2)              | 277.3<br>(971.8)                 | 1420.9**<br>(602.9)            | 388.8<br>(967.6)               |
| \$180k                    | 1413.6**<br>(616.3)             | 1519.6<br>(985.2)               | 1917.3***<br>(721.7)             | 270.5<br>(1081.3)                | 1853.1**<br>(724.1)            | 368.0<br>(1087.1)              |
| \$190k                    | 2741.0***<br>(845.2)            | -461.2<br>(1150.1)              | 1090.6<br>(707.8)                | 1574.5<br>(1271.7)               | 1000.7<br>(715.2)              | 1722.7<br>(1263.5)             |
| \$200k                    | 2352.3***<br>(825.2)            | -462.8<br>(1292.1)              | 2519.4***<br>(885.6)             | -1131.3<br>(1454.3)              | 2416.6***<br>(871.6)           | -953.0<br>(1444.7)             |
| \$210k                    | 2505.1***<br>(887.1)            | 1664.3<br>(1305.0)              | 561.4<br>(817.6)                 | 1056.4<br>(1588.6)               | 787.6<br>(821.4)               | 933.4<br>(1595.0)              |
| \$220k                    | 3606.2***<br>(871.9)            | 3546.5**<br>(1778.0)            | 1423.2<br>(949.3)                | 3350.2*<br>(1746.8)              | 1349.8<br>(939.4)              | 3234.7*<br>(1748.3)            |
| \$230k                    | 6026.9***<br>(1038.2)           | 6585.5***<br>(2018.2)           | 4567.1***<br>(1293.5)            | 3955.4*<br>(2043.5)              | 4706.2***<br>(1295.4)          | 3733.9*<br>(2056.9)            |
| \$240k                    | 6833.1***<br>(1481.2)           | 6546.9**<br>(2583.3)            | 2289.5<br>(1624.5)               | 4451.7*<br>(2422.8)              | 2486.0<br>(1639.9)             | 4692.1*<br>(2445.3)            |
| \$250k                    | 4908.8***<br>(1519.3)           | 7792.7**<br>(3059.8)            | 2984.5*<br>(1628.7)              | 5140.3*<br>(2877.0)              | 3180.4*<br>(1659.8)            | 5005.4*<br>(2900.7)            |
| \$260k                    | 11285.2***<br>(1926.6)          | 11029.2***<br>(3546.1)          | 6285.2***<br>(2010.7)            | 7600.7**<br>(3118.5)             | 6459.2***<br>(2064.9)          | 7341.1**<br>(3134.5)           |
| \$270k                    | 6980.6***<br>(2252.8)           | 7403.0**<br>(3582.8)            | 6311.8***<br>(2145.5)            | 7826.8**<br>(3239.8)             | 6498.9***<br>(2152.3)          | 7738.6**<br>(3259.2)           |
| \$280k                    | 9466.5***<br>(2231.2)           | 10353.0**<br>(4038.6)           | 7243.6***<br>(2337.0)            | 6706.3*<br>(3657.0)              | 7525.2***<br>(2362.3)          | 6579.9*<br>(3718.2)            |
| \$290k                    | 10645.8***<br>(3235.1)          | -1046.8<br>(4818.0)             | 9856.1***<br>(3265.2)            | 1782.3<br>(4554.9)               | 9905.9***<br>(3281.3)          | 1089.7<br>(4588.4)             |
| \$300k                    | 7215.0*<br>(4017.5)             | 3876.4<br>(4965.1)              | 9242.8**<br>(3635.4)             | 3091.7<br>(5158.7)               | 8991.2**<br>(3691.0)           | 3489.4<br>(5211.7)             |
| 5th-Order Poly            | YES                             | YES                             | YES                              | YES                              | YES                            | YES                            |
| Time Controls             | YES                             | YES                             | YES                              | YES                              | YES                            | YES                            |
| Zip Code Dummies          | YES                             | YES                             | YES                              | YES                              | YES                            | YES                            |
| House Controls            | YES                             | YES                             | YES                              | YES                              | YES                            | YES                            |
| Transaction Controls      | YES                             | YES                             | YES                              | YES                              | YES                            | YES                            |
| Renovation Controls       | YES                             | YES                             | YES                              | YES                              | YES                            | YES                            |
| Observations              | 48237                           | 20179                           | 48237                            | 20179                            | 48237                          | 20179                          |
| R-squared                 | 0.943                           | 0.936                           | 0.928                            | 0.922                            | 0.927                          | 0.921                          |

Note: Models are estimated using OLS with errors clustered by agency. The bolded lines present a joint significance test for whether all estimated discontinuities are jointly statistically different from zero. Time controls include dummies for year and month of the current sale as well as the logged number of days between sales. House, transaction, and renovation controls listed in appendix Table A2. Large and small firms are measured as being above or below the median of brokerage size, calculated using the number of agents employed at the brokerage in a given year. \* p<0.1, \*\* p<0.05, \*\*\* p<0.01.

**Table A4: Study 1 Discontinuity Results by Franchise Non-Franchise Brokerages**

| Dependent Variable:       | (1)<br>Non-Franchise<br>List Price | (2)<br>Franchise<br>List Price | (3)<br>Non-Franchise<br>Sales Price | (4)<br>Franchise<br>Sales Price | (5)<br>Non-Franchise<br>Net Price | (6)<br>Franchise<br>Net Price |
|---------------------------|------------------------------------|--------------------------------|-------------------------------------|---------------------------------|-----------------------------------|-------------------------------|
| <b>Avg. Discontinuity</b> | <b>3705.88</b>                     | <b>3727.24</b>                 | <b>3020.66</b>                      | <b>2670.73</b>                  | <b>3018.82</b>                    | <b>2720.09</b>                |
| <b>F-stat</b>             | <b>38.93</b>                       | <b>37.63</b>                   | <b>24.35</b>                        | <b>15.90</b>                    | <b>24.12</b>                      | <b>16.19</b>                  |
| <b>Prob &gt; F</b>        | <b>0.0000</b>                      | <b>0.0000</b>                  | <b>0.0000</b>                       | <b>0.0001</b>                   | <b>0.0000</b>                     | <b>0.0001</b>                 |
| \$100k                    | -917.8<br>(1048.4)                 | 2568.0*<br>(1387.5)            | -399.7<br>(910.5)                   | 1472.9<br>(1277.9)              | -282.4<br>(918.8)                 | 1584.4<br>(1276.1)            |
| \$110k                    | -1081.5<br>(713.6)                 | 1185.0<br>(765.7)              | -820.7<br>(695.5)                   | 165.4<br>(700.9)                | -811.5<br>(702.0)                 | 152.8<br>(688.8)              |
| \$120k                    | 461.4<br>(570.0)                   | 677.9<br>(605.8)               | 663.9<br>(565.1)                    | 90.0<br>(672.0)                 | 627.3<br>(559.2)                  | 26.4<br>(673.7)               |
| \$130k                    | 1065.7*<br>(579.3)                 | 974.5*<br>(510.2)              | 1484.1**<br>(617.2)                 | 621.5<br>(500.9)                | 1377.4**<br>(614.8)               | 650.8<br>(495.3)              |
| \$140k                    | 944.5*<br>(493.0)                  | 921.7**<br>(419.5)             | 1360.1***<br>(509.0)                | 830.1<br>(562.6)                | 1353.2***<br>(507.6)              | 789.2<br>(561.6)              |
| \$150k                    | 1568.7***<br>(516.1)               | 1665.4***<br>(479.0)           | 2105.0***<br>(573.7)                | 1684.5***<br>(539.7)            | 2064.0***<br>(590.7)              | 1843.8***<br>(503.2)          |
| \$160k                    | 1799.5***<br>(644.4)               | 1489.7***<br>(480.1)           | 2205.5***<br>(603.9)                | 831.9<br>(567.8)                | 2286.0***<br>(601.1)              | 765.1<br>(590.0)              |
| \$170k                    | 1160.7*<br>(702.8)                 | 1184.5*<br>(654.7)             | 1147.5<br>(762.1)                   | 825.4<br>(677.9)                | 1178.2<br>(765.5)                 | 795.7<br>(694.1)              |
| \$180k                    | 1295.4*<br>(753.8)                 | 1482.0**<br>(699.4)            | 946.6<br>(781.7)                    | 1691.3*<br>(905.9)              | 957.1<br>(787.1)                  | 1646.4*<br>(904.1)            |
| \$190k                    | 2019.3**<br>(990.9)                | 1417.8<br>(946.1)              | 2180.4**<br>(931.7)                 | 296.6<br>(764.5)                | 2159.4**<br>(934.4)               | 292.9<br>(763.7)              |
| \$200k                    | 639.7<br>(1035.4)                  | 2282.6**<br>(887.9)            | -224.1<br>(1028.1)                  | 2810.1***<br>(1045.1)           | -59.1<br>(1018.6)                 | 2590.6**<br>(1024.9)          |
| \$210k                    | 2896.2***<br>(1092.4)              | 1430.2<br>(934.3)              | 1068.3<br>(1183.1)                  | 179.9<br>(857.6)                | 1015.8<br>(1181.7)                | 482.1<br>(870.8)              |
| \$220k                    | 4074.6***<br>(1231.7)              | 3152.1***<br>(969.6)           | 2899.9**<br>(1275.7)                | 960.7<br>(1124.8)               | 2933.0**<br>(1267.7)              | 762.9<br>(1107.3)             |
| \$230k                    | 6809.0***<br>(1400.9)              | 5371.4***<br>(1215.0)          | 3271.6**<br>(1491.6)                | 5104.5***<br>(1584.4)           | 3212.4**<br>(1481.5)              | 5231.7***<br>(1605.3)         |
| \$240k                    | 6654.3***<br>(1818.2)              | 6464.1***<br>(1829.8)          | 2926.6*<br>(1753.9)                 | 2523.2<br>(2075.3)              | 3125.3*<br>(1778.8)               | 2746.1<br>(2104.4)            |
| \$250k                    | 7718.9***<br>(2096.7)              | 3947.2**<br>(1850.4)           | 4749.9**<br>(1940.4)                | 2673.5<br>(2077.7)              | 4773.4**<br>(1950.7)              | 2848.6<br>(2121.6)            |
| \$260k                    | 11617.7***<br>(2638.9)             | 10956.5***<br>(2093.6)         | 7877.6***<br>(2474.9)               | 5488.4**<br>(2330.6)            | 7680.6***<br>(2495.0)             | 5753.5**<br>(2398.0)          |
| \$270k                    | 8132.3***<br>(2562.5)              | 6098.4**<br>(2823.2)           | 6878.7***<br>(2509.0)               | 6395.2**<br>(2625.0)            | 6844.0***<br>(2522.2)             | 6652.5**<br>(2641.6)          |
| \$280k                    | 12471.4***<br>(2559.1)             | 6870.0**<br>(2796.6)           | 8044.9***<br>(2454.7)               | 6137.1**<br>(3014.7)            | 8187.9***<br>(2488.1)             | 6372.8**<br>(3033.7)          |
| \$290k                    | 2624.0<br>(4059.2)                 | 11327.6***<br>(3712.0)         | 9229.5***<br>(3470.4)               | 5610.1<br>(4016.8)              | 8806.5**<br>(3515.6)              | 5710.7<br>(4034.5)            |
| \$300k                    | 5869.5<br>(4714.8)                 | 6805.4<br>(4268.2)             | 5838.2<br>(4377.2)                  | 9693.0**<br>(4109.2)            | 5966.9<br>(4447.9)                | 9422.8**<br>(4136.7)          |
| 5th-Order Poly            | YES                                | YES                            | YES                                 | YES                             | YES                               | YES                           |
| Time Controls             | YES                                | YES                            | YES                                 | YES                             | YES                               | YES                           |
| Zip Code Dummies          | YES                                | YES                            | YES                                 | YES                             | YES                               | YES                           |
| House Controls            | YES                                | YES                            | YES                                 | YES                             | YES                               | YES                           |
| Transaction Controls      | YES                                | YES                            | YES                                 | YES                             | YES                               | YES                           |
| Renovation Controls       | YES                                | YES                            | YES                                 | YES                             | YES                               | YES                           |
| Observations              | 34531                              | 33885                          | 34531                               | 33885                           | 34531                             | 33885                         |
| R-squared                 | 0.938                              | 0.944                          | 0.922                               | 0.930                           | 0.921                             | 0.929                         |

Note: Models are estimated using OLS with errors clustered by agency. The bolded lines present a joint significance test for whether all estimated discontinuities are jointly statistically different from zero. Time controls include dummies for year and month of the current sale as well as the logged number of days between sales. House, transaction, and renovation controls listed in appendix Table A2. Franchise brokerages are brokerages that belong to national franchised chains (i.e., Keller Williams, RE/Max, Coldwell Banker, etc.). \* p<0.1, \*\* p<0.05, \*\*\* p<0.01.

**Table A5: Study 1 Main Discontinuity Results, 7<sup>th</sup> Order Polynomial**

| Dependent Variable:       | (1)<br>List Price      | (2)<br>List Price      | (3)<br>Sales Price     | (4)<br>Sales Price    | (5)<br>Net Price       | (6)<br>Net Price      |
|---------------------------|------------------------|------------------------|------------------------|-----------------------|------------------------|-----------------------|
| <b>Avg. Discontinuity</b> | <b>6296.26</b>         | <b>3000.77</b>         | <b>5291.53</b>         | <b>2068.77</b>        | <b>5307.29</b>         | <b>2098.06</b>        |
| <b>F-stat</b>             | <b>72.10</b>           | <b>80.79</b>           | <b>52.95</b>           | <b>32.31</b>          | <b>53.50</b>           | <b>33.00</b>          |
| <b>Prob &gt; F</b>        | <b>0.0000</b>          | <b>0.0000</b>          | <b>0.0000</b>          | <b>0.0000</b>         | <b>0.0000</b>          | <b>0.0000</b>         |
| \$100k                    | 7069.0***<br>(1408.5)  | 608.2<br>(985.8)       | 5783.2***<br>(1445.9)  | 450.0<br>(845.1)      | 5889.0***<br>(1426.3)  | 560.7<br>(847.5)      |
| \$110k                    | 6445.3***<br>(1150.8)  | 438.4<br>(596.7)       | 4960.6***<br>(1053.6)  | 64.1<br>(530.2)       | 4909.1***<br>(1096.5)  | 67.9<br>(524.1)       |
| \$120k                    | 6350.8***<br>(960.8)   | 1021.0**<br>(422.5)    | 5507.0***<br>(891.2)   | 781.3*<br>(458.4)     | 5409.1***<br>(898.5)   | 739.8<br>(458.1)      |
| \$130k                    | 5171.4***<br>(872.6)   | 1308.7***<br>(361.7)   | 4837.8***<br>(876.4)   | 1250.6***<br>(390.0)  | 4869.3***<br>(884.6)   | 1207.6***<br>(385.7)  |
| \$140k                    | 3505.7***<br>(1053.5)  | 885.2***<br>(333.0)    | 3968.3***<br>(976.6)   | 931.0**<br>(386.2)    | 3931.1***<br>(996.2)   | 904.4**<br>(384.5)    |
| \$150k                    | 2201.0**<br>(954.2)    | 1259.9***<br>(383.7)   | 2527.0***<br>(867.7)   | 1481.0***<br>(379.5)  | 2599.5***<br>(872.1)   | 1517.7***<br>(376.9)  |
| \$160k                    | 1860.2*<br>(1037.4)    | 1165.1**<br>(459.1)    | 2374.7**<br>(1027.7)   | 1162.7**<br>(482.1)   | 2346.7**<br>(1013.4)   | 1161.5**<br>(487.3)   |
| \$170k                    | 2705.3**<br>(1357.0)   | 720.6<br>(469.2)       | 2165.6*<br>(1205.5)    | 797.3<br>(495.4)      | 2139.7*<br>(1212.3)    | 771.5<br>(501.9)      |
| \$180k                    | 2214.4<br>(1387.8)     | 1089.7**<br>(514.5)    | 2067.9<br>(1352.3)     | 1374.0**<br>(597.7)   | 2015.3<br>(1366.6)     | 1342.1**<br>(596.6)   |
| \$190k                    | 2973.2*<br>(1568.8)    | 1805.3**<br>(723.4)    | 2781.7**<br>(1329.9)   | 1639.4**<br>(649.2)   | 2780.5**<br>(1334.7)   | 1609.2**<br>(651.3)   |
| \$200k                    | 3066.2*<br>(1776.0)    | 1829.9**<br>(823.1)    | 3494.5**<br>(1748.6)   | 2011.4**<br>(878.1)   | 3375.5*<br>(1735.7)    | 1989.8**<br>(864.1)   |
| \$210k                    | 6559.7***<br>(2168.4)  | 2946.9***<br>(859.2)   | 5104.1**<br>(2048.7)   | 1501.4*<br>(858.7)    | 5139.0**<br>(2059.7)   | 1637.0*<br>(864.9)    |
| \$220k                    | 9349.9***<br>(2349.7)  | 4634.3***<br>(948.2)   | 7903.0***<br>(2263.1)  | 2741.1***<br>(952.5)  | 7894.6***<br>(2276.1)  | 2679.5***<br>(946.4)  |
| \$230k                    | 8728.9***<br>(2485.3)  | 7064.8***<br>(969.2)   | 8553.8***<br>(2379.8)  | 4680.8***<br>(1073.9) | 8585.9***<br>(2394.5)  | 4754.0***<br>(1076.0) |
| \$240k                    | 12943.3***<br>(2492.0) | 7363.8***<br>(1360.3)  | 8905.8***<br>(2875.1)  | 2680.8*<br>(1488.9)   | 9052.2***<br>(2893.8)  | 2925.7*<br>(1502.7)   |
| \$250k                    | 8223.7***<br>(3097.5)  | 5858.5***<br>(1529.9)  | 6041.7**<br>(2870.6)   | 2777.2*<br>(1538.3)   | 6177.9**<br>(2897.8)   | 2895.0*<br>(1561.7)   |
| \$260k                    | 16293.2***<br>(3700.3) | 10657.1***<br>(1951.5) | 11327.0***<br>(3406.1) | 5323.1***<br>(1829.4) | 11469.2***<br>(3465.8) | 5387.2***<br>(1871.3) |
| \$270k                    | 13442.2***<br>(3951.8) | 5371.5**<br>(2116.6)   | 11159.6***<br>(3744.7) | 5001.2**<br>(2129.4)  | 11176.7***<br>(3801.1) | 5059.9**<br>(2141.0)  |
| \$280k                    | 13118.1***<br>(4154.8) | 6987.1***<br>(2549.8)  | 11658.6***<br>(4233.6) | 6795.7***<br>(2531.7) | 11693.0***<br>(4253.0) | 6848.8***<br>(2543.9) |
| 7th-Order Poly            | YES                    | YES                    | YES                    | YES                   | YES                    | YES                   |
| Time Controls             | YES                    | YES                    | YES                    | YES                   | YES                    | YES                   |
| Zip Code Dummies          |                        | YES                    |                        | YES                   |                        | YES                   |
| House Controls            |                        | YES                    |                        | YES                   |                        | YES                   |
| Transaction Controls      |                        | YES                    |                        | YES                   |                        | YES                   |
| Renovation Controls       |                        | YES                    |                        | YES                   |                        | YES                   |
| Observations              | 81305                  | 67014                  | 67668                  | 67014                 | 67641                  | 67014                 |
| R-squared                 | 0.693                  | 0.939                  | 0.698                  | 0.923                 | 0.701                  | 0.922                 |

Note: Models are estimated using OLS with errors clustered by agency. The bolded lines present a joint significance test for whether all estimated discontinuities are jointly statistically different from zero. Time controls include dummies for year and month of the current sale as well as the logged number of days between sales. House, transaction, and renovation controls listed in appendix Table A2. \* p<0.1, \*\* p<0.05, \*\*\* p<0.01.

**Table A6: Study 1 Performance Results**

| Dependent Variable:       | (1)<br>Days on Mkt | (2)<br>Days on Mkt | (3)<br>Days on Mkt | (4)<br>Prob.(Fail)  | (5)<br>Prob.(Fail)   |
|---------------------------|--------------------|--------------------|--------------------|---------------------|----------------------|
| <b>Avg. Discontinuity</b> | <b>1.6786</b>      | <b>1.7753</b>      | <b>1.5627</b>      | <b>-0.0024</b>      | <b>-0.0063</b>       |
| <b>F-stat</b>             | <b>2.56</b>        | <b>2.97</b>        | <b>2.36</b>        | <b>0.16</b>         | <b>1.87</b>          |
| <b>Prob &gt; F</b>        | <b>0.1101</b>      | <b>0.0851</b>      | <b>0.1250</b>      | <b>0.6890</b>       | <b>0.1721</b>        |
| \$100k                    | -5.57**<br>(2.42)  | -4.24*<br>(2.41)   | -2.89<br>(2.52)    | -0.017<br>(0.014)   | -0.0062<br>(0.011)   |
| \$110k                    | -2.33<br>(1.88)    | -1.91<br>(1.84)    | -2.24<br>(1.92)    | -0.0093<br>(0.010)  | -0.012<br>(0.0090)   |
| \$120k                    | -0.23<br>(1.62)    | 0.98<br>(1.60)     | 0.23<br>(1.63)     | -0.0075<br>(0.010)  | -0.0092<br>(0.0081)  |
| \$130k                    | -0.95<br>(1.65)    | -0.35<br>(1.63)    | -1.31<br>(1.63)    | 0.00039<br>(0.010)  | -0.00042<br>(0.0080) |
| \$140k                    | 0.40<br>(1.45)     | 0.56<br>(1.47)     | 1.20<br>(1.43)     | -0.0036<br>(0.0089) | -0.0091<br>(0.0075)  |
| \$150k                    | -0.23<br>(1.76)    | -0.54<br>(1.76)    | -0.11<br>(1.73)    | 0.0042<br>(0.010)   | 0.00019<br>(0.0080)  |
| \$160k                    | 1.18<br>(1.57)     | 1.47<br>(1.56)     | 2.21<br>(1.55)     | 0.019*<br>(0.010)   | 0.014*<br>(0.0083)   |
| \$170k                    | 1.63<br>(1.92)     | 1.36<br>(1.89)     | 2.04<br>(1.74)     | -0.0051<br>(0.012)  | -0.0042<br>(0.0087)  |
| \$180k                    | 0.59<br>(2.00)     | 0.90<br>(2.00)     | 2.46<br>(2.05)     | 0.020<br>(0.012)    | 0.014<br>(0.010)     |
| \$190k                    | 4.16**<br>(2.04)   | 4.63**<br>(2.03)   | 6.11***<br>(2.00)  | 0.012<br>(0.013)    | 0.011<br>(0.010)     |
| \$200k                    | 3.15<br>(2.41)     | 2.85<br>(2.40)     | 3.71<br>(2.44)     | -0.011<br>(0.016)   | -0.012<br>(0.013)    |
| \$210k                    | 1.78<br>(2.50)     | 2.60<br>(2.49)     | 4.15<br>(2.52)     | -0.015<br>(0.015)   | -0.0038<br>(0.012)   |
| \$220k                    | 3.56<br>(2.70)     | 3.76<br>(2.71)     | 3.63<br>(2.74)     | -0.011<br>(0.015)   | -0.019*<br>(0.011)   |
| \$230k                    | 4.56<br>(2.93)     | 4.30<br>(2.91)     | 4.33<br>(3.04)     | 0.0065<br>(0.018)   | 0.0030<br>(0.014)    |
| \$240k                    | 7.11**<br>(2.97)   | 7.84***<br>(2.92)  | 5.92**<br>(2.81)   | -0.035**<br>(0.018) | -0.034**<br>(0.014)  |
| \$250k                    | 13.5***<br>(3.59)  | 12.9***<br>(3.52)  | 11.8***<br>(3.75)  | -0.027<br>(0.021)   | -0.032**<br>(0.016)  |
| \$260k                    | 5.82<br>(3.82)     | 4.51<br>(3.88)     | 0.89<br>(4.39)     | -0.032<br>(0.024)   | -0.037**<br>(0.017)  |
| \$270k                    | 7.58*<br>(4.25)    | 6.51<br>(4.13)     | 3.27<br>(4.19)     | 0.024<br>(0.024)    | -0.00096<br>(0.019)  |
| \$280k                    | 0.33<br>(4.38)     | -0.35<br>(4.37)    | -2.59<br>(4.61)    | -0.023<br>(0.025)   | -0.028<br>(0.020)    |
| \$290k                    | -0.31<br>(4.46)    | -0.047<br>(4.34)   | 0.0049<br>(4.13)   | 0.062*<br>(0.032)   | 0.037<br>(0.023)     |
| \$300k                    | -10.5*<br>(6.16)   | -10.4*<br>(6.04)   | -9.99*<br>(6.00)   | -0.00096<br>(0.037) | -0.0054<br>(0.026)   |
| 5th-Order Poly            | YES                | YES                | YES                | YES                 | YES                  |
| Time Controls             | YES                | YES                | YES                | YES                 | YES                  |
| Zip Code Dummies          |                    | YES                | YES                |                     | YES                  |
| House Controls            |                    | YES                | YES                |                     | YES                  |
| Transaction Controls      |                    | YES                | YES                |                     | YES                  |
| Renovation Controls       |                    |                    | YES                |                     |                      |
| Observations              | 83122              | 83079              | 68382              | 83164               | 83121                |
| R-squared                 | 0.092              | 0.118              | 0.113              | 0.094               | 0.366                |

Note: Models are estimated using OLS with errors clustered by agency. The bolded lines present a joint significance test for whether all estimated discontinuities are jointly statistically different from zero. Time controls include dummies for year and month of the current sale as well as the logged number of days between sales. House, transaction, and renovation controls listed in appendix Table A2. Days on market is the difference between original listing and close date. Failure is defined as a home being listed but not selling within the original listing contract timeline. \* p<0.1, \*\* p<0.05, \*\*\* p<0.01.

**Table A7: Study 2 Pre-Test Correlations and Means in Pretest**

|                          | <u>1</u> | <u>2</u> | <u>3</u> | <u>4</u> | <u>5</u> | <u>6</u> |
|--------------------------|----------|----------|----------|----------|----------|----------|
| 1. Est. Listing Price    | 1.00     |          |          |          |          |          |
| 2. Age                   | 0.00     | 1.00     |          |          |          |          |
| 3. Female                | 0.00     | 0.10 **  | 1.00     |          |          |          |
| 4. Purchased Real Estate | 0.01     | 0.32 **  | 0.07 *   | 1.00     |          |          |
| 6. Estimated Quality     | 0.33 **  | -0.03    | -0.16 ** | -0.01    | -0.07    |          |
| 7. Estimated Location    | 0.24 **  | 0.06 *   | -0.13 ** | 0.02     | 0.06 **  | 1.00     |
| Mean                     | 282,089  | 34.9     | 0.41     | 1.57     | 75       | 70       |
| Median                   | 205,000  | 31.0     | 0.00     | 2.00     | 80       | 75       |

\*\* Correlation is significant at the 0.01 level (2-tailed).

Note: N= 1,422 Person-House Estimates. Purchased Real Estate denoted by a dummy variable.

**Table A8: Study 2 Pretest Estimated List Price by Condition and House**

| Previous Sale Price<br>Position Relative to<br>Round Number | House 1    |                         |           |          | House 2  |                         |           |          |
|-------------------------------------------------------------|------------|-------------------------|-----------|----------|----------|-------------------------|-----------|----------|
|                                                             | Previous   | Estimated Listing Price |           |          | Previous | Estimated Listing Price |           |          |
|                                                             | Sale Price | <i>M</i>                | <i>SD</i> | <i>N</i> | Price    | <i>M</i>                | <i>SD</i> | <i>N</i> |
| Slightly Above                                              | 151,000    | 184,564                 | 95,912    | 98       | 201,300  | 222,474                 | 60,938    | 95       |
| Slightly Below                                              | 149,000    | 166,849                 | 70,238    | 97       | 198,700  | 204,597                 | 28,549    | 89       |
| Well Below                                                  | 147,000    | 168,088                 | 71,419    | 90       | 196,100  | 206,821                 | 47,700    | 96       |
| Total                                                       |            | 173,332                 | 80,465    | 285      |          | 211,425                 | 48,442    | 280      |

  

| Previous Sale Price<br>Position Relative to<br>Round Number | House 3  |                         |           |          | House 4    |                         |           |          |
|-------------------------------------------------------------|----------|-------------------------|-----------|----------|------------|-------------------------|-----------|----------|
|                                                             | Previous | Estimated Listing Price |           |          | Previous   | Estimated Listing Price |           |          |
|                                                             | Price    | <i>M</i>                | <i>SD</i> | <i>N</i> | Sale Price | <i>M</i>                | <i>SD</i> | <i>N</i> |
| Slightly Above                                              | 301,500  | 318,914                 | 55,921    | 95       | 291,000    | 173,686                 | 63,764    | 96       |
| Slightly Below                                              | 298,500  | 311,101                 | 48,784    | 97       | 289,000    | 177,603                 | 73,340    | 93       |
| Well Below                                                  | 295,500  | 311,033                 | 41,860    | 90       | 287,000    | 173,582                 | 64,093    | 94       |
| Total                                                       |          | 313,711                 | 49,274    | 282      |            | 174,939                 | 66,953    | 283      |

  

| Previous Sale Price<br>Position Relative to<br>Round Number | House 5  |                         |           |          |
|-------------------------------------------------------------|----------|-------------------------|-----------|----------|
|                                                             | Previous | Estimated Listing Price |           |          |
|                                                             | Price    | <i>M</i>                | <i>SD</i> | <i>N</i> |
| Slightly Above                                              | 601,600  | 542,579                 | 66,426    | 95       |
| Slightly Below                                              | 598,400  | 541,282                 | 61,956    | 91       |
| Well Below                                                  | 595,200  | 535,858                 | 66,959    | 94       |
| Total                                                       |          | 539,901                 | 65,023    | 280      |

Note: Table displays 289 participants' estimated listing prices for each of the three conditions for each of the five houses in the pretest. Just above represents previous sale prices that are up to \$1,600 above the round number, just below represents previous sale prices that are as low as \$1,600 below the round number, and well below represents previous sale prices that are more than \$1,600 below the round number.

**Table A9: Study 2 Pretest Linear Cross-Nested Mixed Models**

| Dependent Variable:             | All<br>Participants<br>(1)<br>Z-Score of<br>Estimated Price | All<br>Participants<br>(2)<br>Estimated Price |
|---------------------------------|-------------------------------------------------------------|-----------------------------------------------|
|                                 | Coefficient<br>Estimate                                     | Coefficient<br>Estimate                       |
| <i>Intercept</i>                | -0.0826<br>(0.0543)                                         | 283364.7***<br>(62,246.0)                     |
| <i>Just Above (a)</i>           | 0.00583*<br>(0.0264)                                        | 6,527.6*<br>(3,024.6)                         |
| <i>Just Below (b)</i>           | -0.0039<br>(0.0267)                                         | -332.3<br>(3,065.2)                           |
| Discontinuity Test              |                                                             |                                               |
| <i>Wald (a-b&gt;b-0)</i>        | X <sup>2</sup> = 2.03<br>(p=0.154)                          | X <sup>2</sup> = 1.83<br>(p=0.176)            |
| Log Likelihood                  | -905.5                                                      | -17,354                                       |
| Likelihood Ratio Test (vs. OLS) | X <sup>2</sup> = 1517.4<br>(p=0.000)                        | X <sup>2</sup> = 2,936.4<br>(p=0.000)         |
| # Participants                  | 289                                                         | 289                                           |
| # Houses                        | 5                                                           | 5                                             |
| Observations                    | 1,410                                                       | 1,410                                         |

Note: This table presents mixed model (HLM) results from the pilot study, with five houses cross-nested with 289 participants. *Just above* represents previous sale prices that are up to \$1,600 above the round number, *just below* represents previous sale prices that are as low as \$1,600 below the round number, and *well below* represents previous sale prices that are more than \$1,600 below the round number. The omitted category is well below. The formal tests of the discontinuity are Wald tests, which are consistent with a large discontinuity but under-powered.
